# Supplementary material for: Electrospun Nanofibre Filtration Media to Protect against Biological or Nonbiological Airborne Particles
Source: MDPI journal article supplement (doi:10.3390/polym13193257), 2021-09-24
Supplement: s1 [file s1]

# Supporting information: Electrospun Nanofibre Filtration Media to Protect Against Biological or Nonbiological Airborne Particles

Fabrice N. H. Karabulut <sup>a</sup>, Günther Höfler <sup>a</sup>, Naveen Ashok Chand <sup>a</sup>  
and Gareth W. Beckermann <sup>a</sup>

<sup>a</sup> NanoLayr Ltd. 59 Mahunga Drive, Mangere Bridge, Auckland 2022, New Zealand

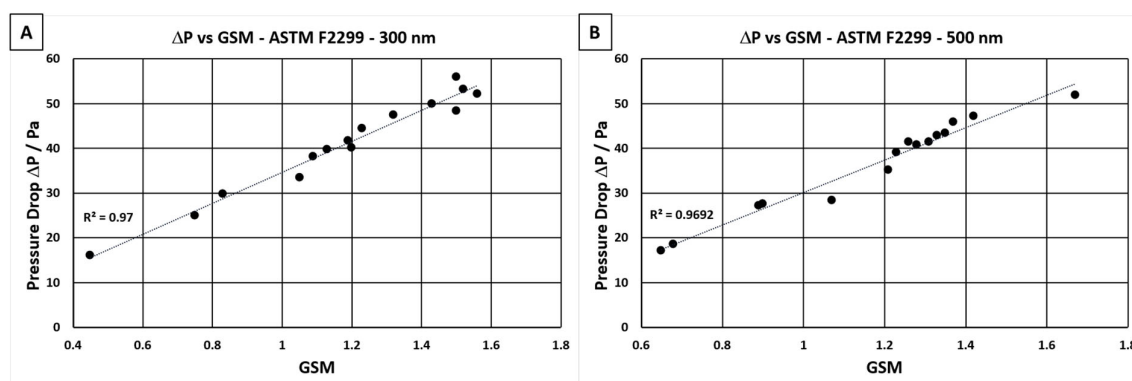

**Figure S1.** Relationships between pressure drop ( $\Delta P$ ) and nanofibre areal weight (gsm) when tested in accordance with ASTM F2299 at a particle size of (A) 300nm and (B) 500nm.
